# Supplementary material for: The etiological evaluation of sensorineural hearing loss in children
Source: Springer Nature journal article supplement (doi:10.1007/s00431-019-03379-8), 2019-05-31

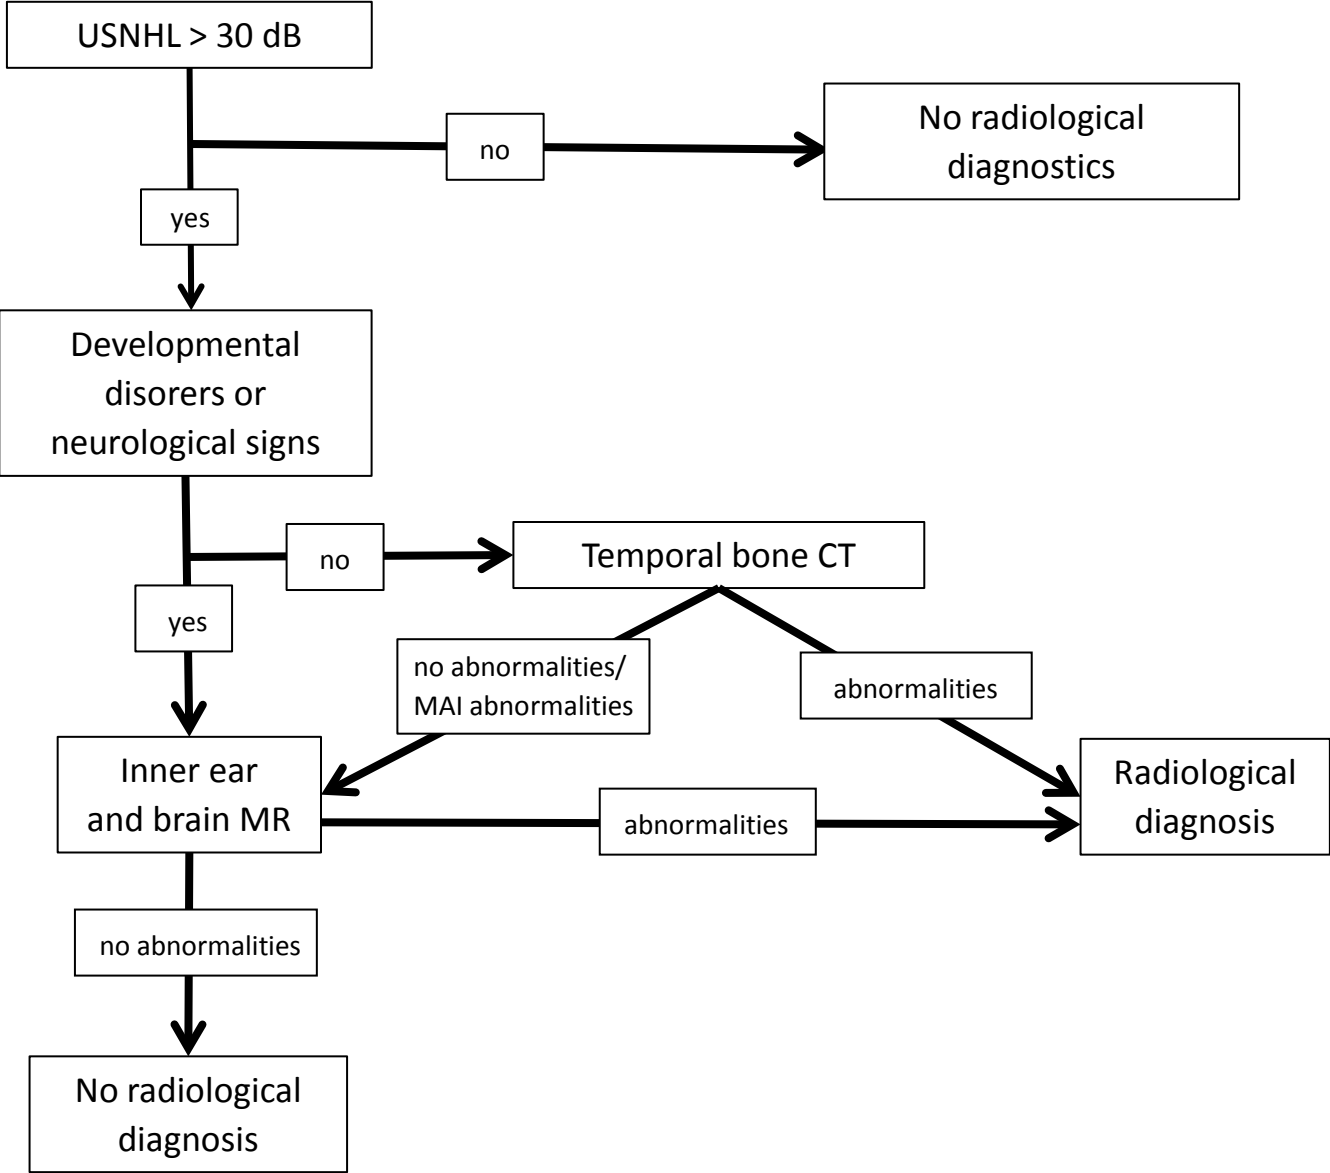

Supplement: MOESM1 [file 16763480]
